# Supplementary material for: Identification and Validation of the Predictive Capacity of Risk Factors and Models in Liver Transplantation Over Time
Source: PubMed Central journal article supplement — Transplant Direct. 2018 Aug 21;4(9):e382. doi: 10.1097/TXD.0000000000000822 (PMC6133402; doi:10.1097/txd.0000000000000822), 2018-08-21

**Figure S1:** log-hazard ratios for recipient risk factors, perfusion fluid and (log-)ET-DRI over 5-years' time for patient survival (1A), death-uncensored graft survival (1B) and death-uncensored graft survival (1C)

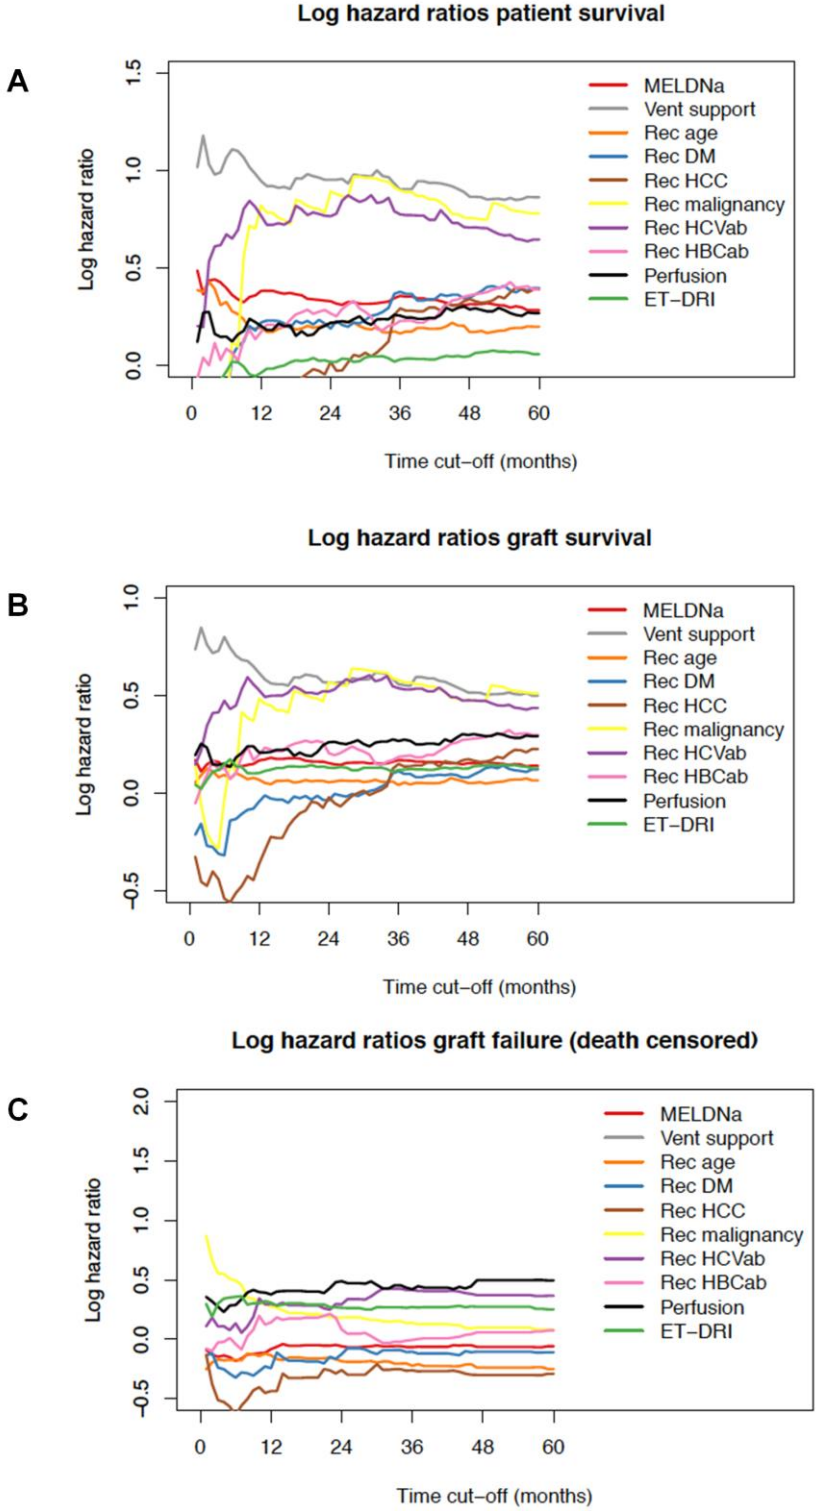

**Figure S2:** c-indices for the optimal combination of significant risk factors over 5-years' time for patient survival (2A), death-uncensored graft survival (2B) and death-uncensored graft survival (2C)

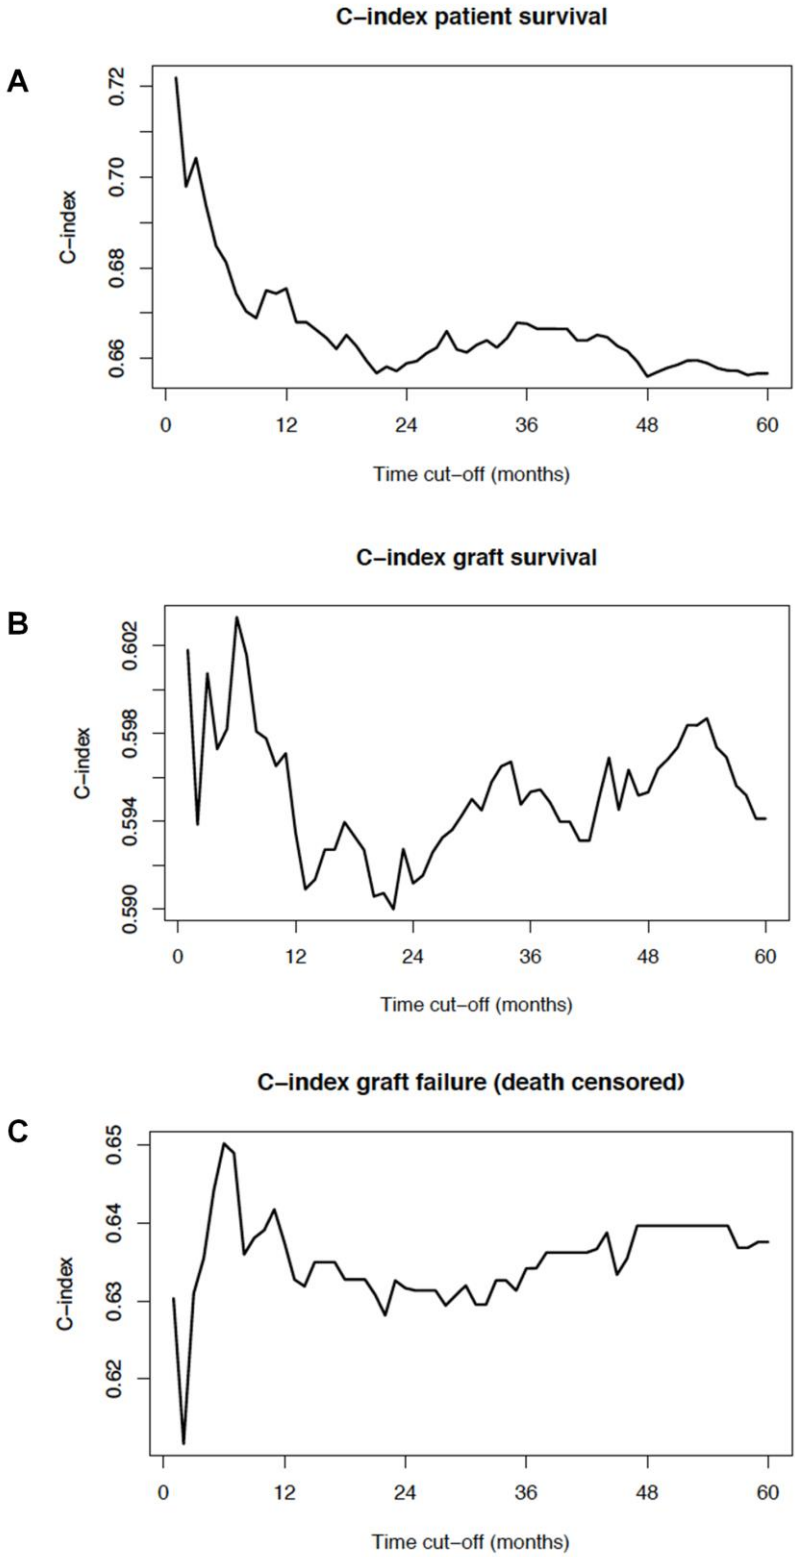

**Figure S3:** highest reachable c-indices for the combination of all available factors over 5-years' time for patient survival (3A), death-uncensored graft survival (3B) and death-uncensored graft survival (3C)

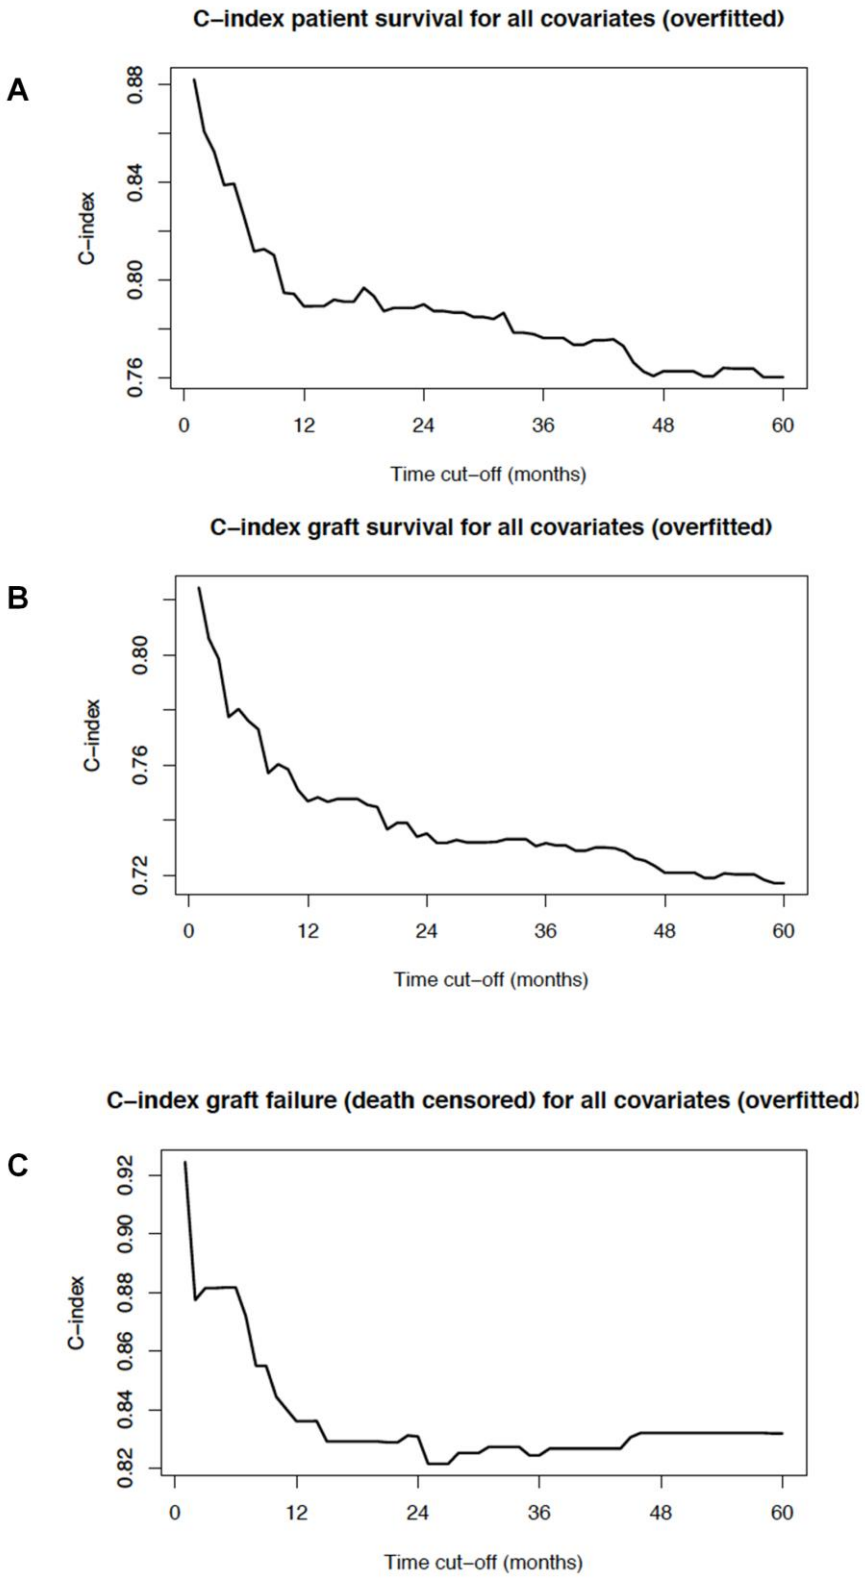

Supplement: txd-4-e382-s001.pdf [file txd-4-e382-s001.pdf]
